# Supplementary material for: Dynamics on the microsecond timescale in hydrous silicates studied by solid-state 2H NMR spectroscopy
Source: Royal Society of Chemistry journal article supplement (doi:10.1039/b924666e), 2010-01-01

**Dynamics on the Microsecond Timescale in Hydrous Silicates  
Studied by Solid-State  $^2\text{H}$  NMR Spectroscopy**

John M. Griffin, Andrew J. Miller, Andrew J. Berry,  
Stephen Wimperis and Sharon E. Ashbrook\*

**Supplementary Information**

**Figure S1:**  $^2\text{H}$  static NMR spectra of OD-clinohumite recorded with a quadrupolar echo pulse sequence at (a, b) 298 K and (c, d) 313 K, with a  $\tau$  interval of (a, c) 50  $\mu\text{s}$  and (b, d) 250  $\mu\text{s}$ , respectively. Spectra were recorded at  $B_0 = 9.4$  T with (a) 1808, (b) 1488, (c) 3072 and (d) 1824 transients, using a recycle interval of 30 s.

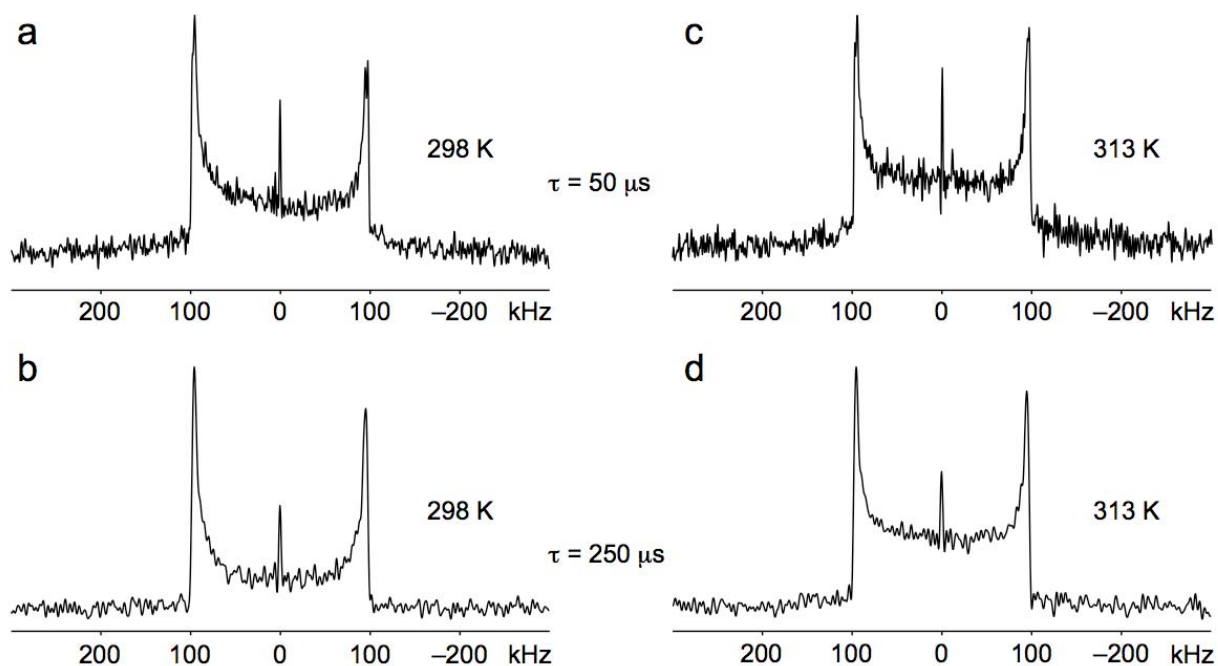

Supplement: b924666e.pdf [file b924666e.pdf]
